# Supplementary material for: Evaluation and regulation of the corrosion resistance of macroporous titanium scaffolds with bioactive surface films for biomedical applications
Source: Royal Society of Chemistry journal article supplement (doi:10.1039/c8tb03359e), 2019-01-01
Supplement: c8tb03359e1.pdf [file c8tb03359e1.pdf]

### Support information

The EDL capacitance value ( $C_{el}$ ) equals to the real surface area ( $S_r$ ) times the specific double layer capacitance ( $C_{sdl}$ ) of the electrode, namely,

$$C_{el} = S_r * C_{sdl} \quad (1)$$

In general, the typical specific double layer capacitance values on some bare metals can range from 10 to 50  $\mu\text{F}/\text{cm}^2$ <sup>[1]</sup>. To estimate the real  $C_{sdl}$  of the used Ti discs as accurate as possible, we selected a dense Ti disc ( $\Phi 9 \times 2 \text{ mm}^3$ ), having a total geometrical surface area of 1.84  $\text{cm}^2$  (including its two faces and a side-perimeter), for estimating the  $C_{sdl}$  values by EIS data by which the  $C_{el}$  value of the planer Ti disc can be extracted from its EDL capacitance–frequency plot at low frequencies, where the EDL capacitance was calculated based the following formula<sup>[2]</sup>.

$$C'(\omega) = \frac{-Z_{im}(\omega)}{\omega |Z(\omega)|^2} \quad (2)$$

Where  $Z_{im}(\omega)$  is the imaginary part of the impedance  $Z(\omega)$ ,  $\omega$  is the angle frequency and  $C'(\omega)$  stands for the real part of the EDL capacitance.

For the dense Ti disc, its EDL capacitance value of 82  $\mu\text{F}$  (at 1 Hz) led to the  $C_{sdl}$  values of 42.3  $\mu\text{F}/\text{cm}^2$ , being in the range of 10-50  $\mu\text{F}/\text{cm}^2$  for bare metals<sup>[1]</sup>. Thus, according to equation 1 and the capacitance values (at 1Hz) of pTi discs shown in Fig. 6, the real surface areas of the tested three pTi discs were calculated to be 29.8, 30.6 and 32.0  $\text{cm}^2$ , respectively, yielding a mean value of 30.8  $\text{cm}^2$ .

### References:

1. M. E. Orazem, T. Bernard, *Electrochemical impedance spectroscopy*, John Wiley & Sons, 2011.
2. P. L. Taberna, P. Simon and J. F. Fauvarque, *Journal of the Electrochemical Society*, 2003, **150**, A292-A300.
